# Supplementary material for: Tumor-infiltrating lymphocytes are functionally inactivated by CD90+ stromal cells and reactivated by combined Ibrutinib and Rapamycin in human pleural mesothelioma
Source: PubMed Central journal article supplement (PMC8690914; doi:10.7150/thno.61209), 2022-01-01
Supplement: thnov12p0167s1.pdf [file thnov12p0167s1.pdf]

## Supplemental Figure legends and Tables

Figure S1

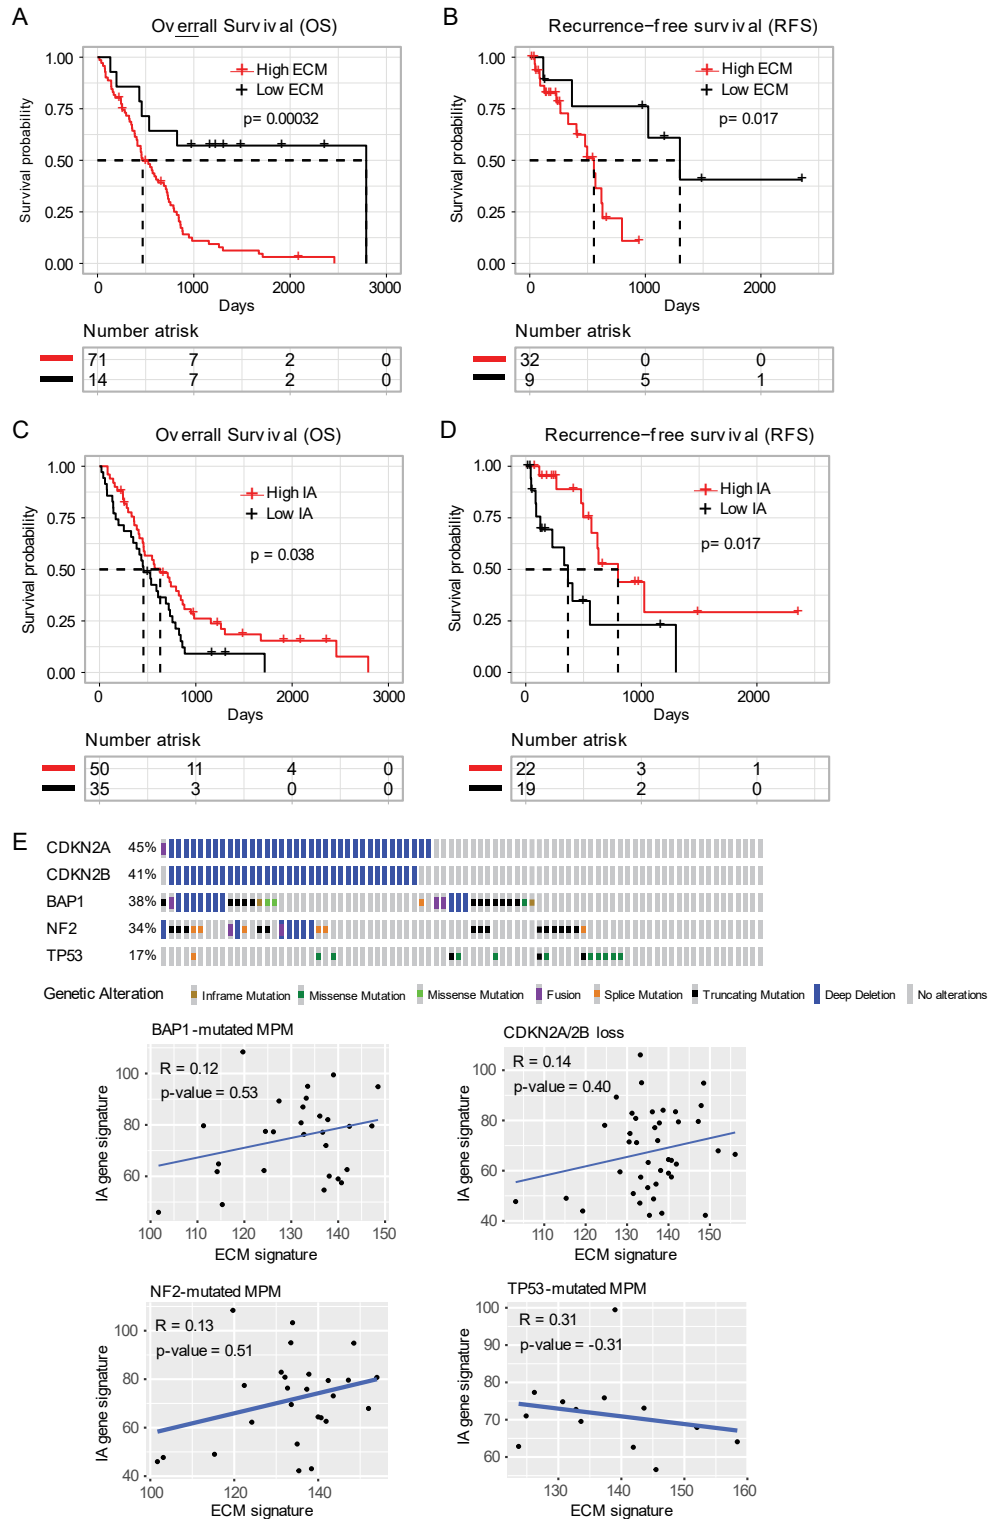

**Figure S1. ECM/stromal genes and CD8 T cell activation genes are associated with prognosis in MPM. (A-D) Unadjusted Kaplan-Meier survival curves from TCGA**

MPM cohort showing overall survival (OS) (A, C) and recurrence-free survival (RFS) (B, D) based on stratification of ECM/stromal (A, B) or IA gene expression (C, D) signature score in treatment naïve MPM. Stratification of MPM patients into high\_ECM (extracellular matrix) (in red) and low ECM (in black) or high IA (in red) and low IA (in black) is based on the optimal cutoff value of ECM gene signature score and IA transcripts across all patients. (E) Several common mutations prevalent in MPM (upper panel) and scatter plots (lower panel) showing correlation between ECM/stromal and IA gene signatures based on several common mutations prevalent in MPM. Related to Figure 1.

Figure S2

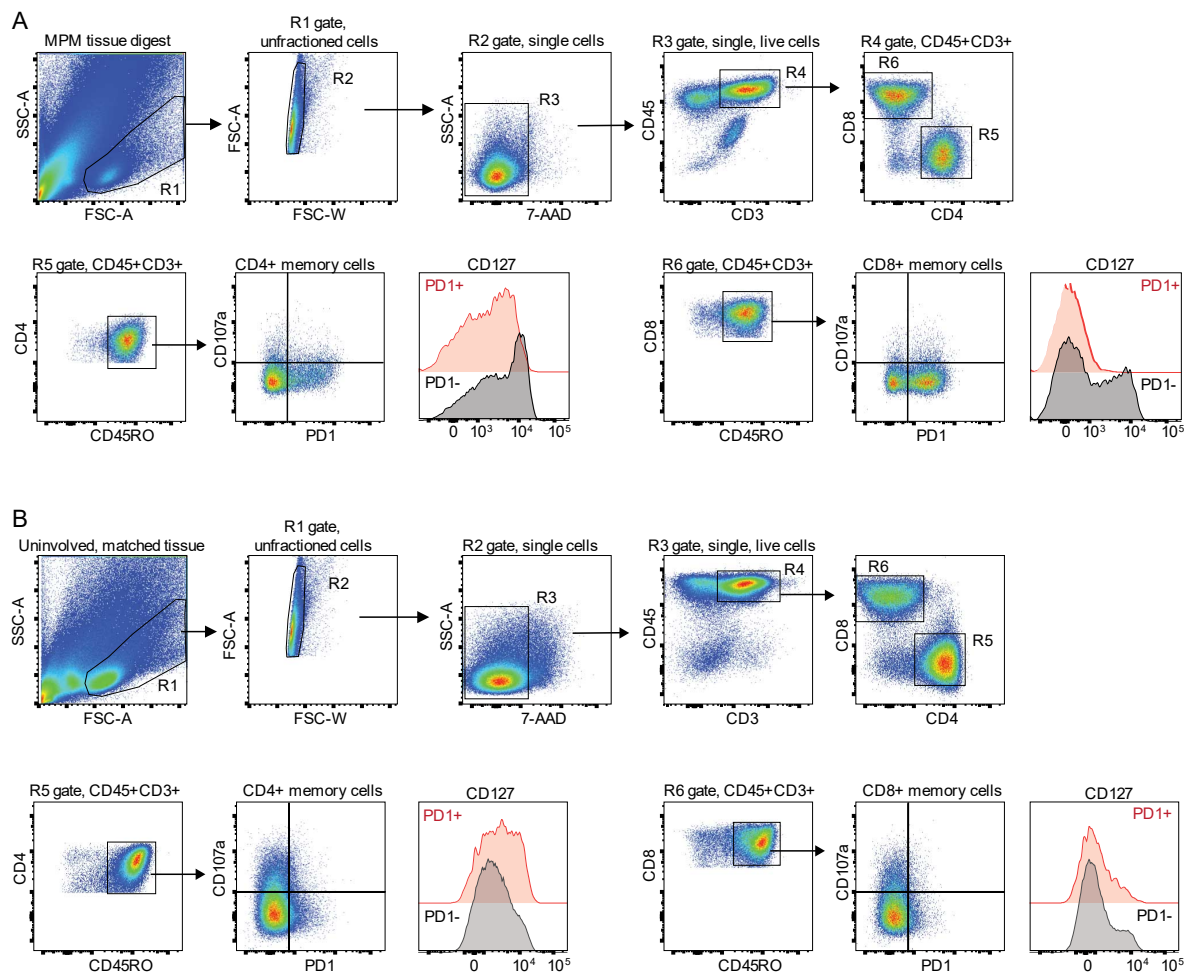

**Figure S2. Flow cytometric gating strategy to identify tumor-infiltrating lymphocytes (TILs).** Representative experiment showing the sequential gating strategy to identify CD8 and CD4 T cells within the tumor (**A**) and matched (**B**) uninvolved lung tissue. R1 gate displayed on an SSC/FSC color density plot subgated to select single cells based on FSC-A versus FSC-W (gate R2), which was further subgated for identification of single live cells (7-AAD negative, gate R3). R3 gate identifying single, live cells was further subgated to show the boundary of CD45<sup>+</sup>CD3<sup>+</sup> cells (gate R4). Single, live CD3<sup>+</sup> cells (gate R4) were displayed on a bivariate plot of CD4 and CD8. CD4 (gate R5) and CD8 (gate R6) cells were then each separately displayed as a bivariate plot to identify CD45RO<sup>+</sup> memory T cells and their coexpression of PD1 and CD107a and CD127. Related to Figure 2.

Figure S3

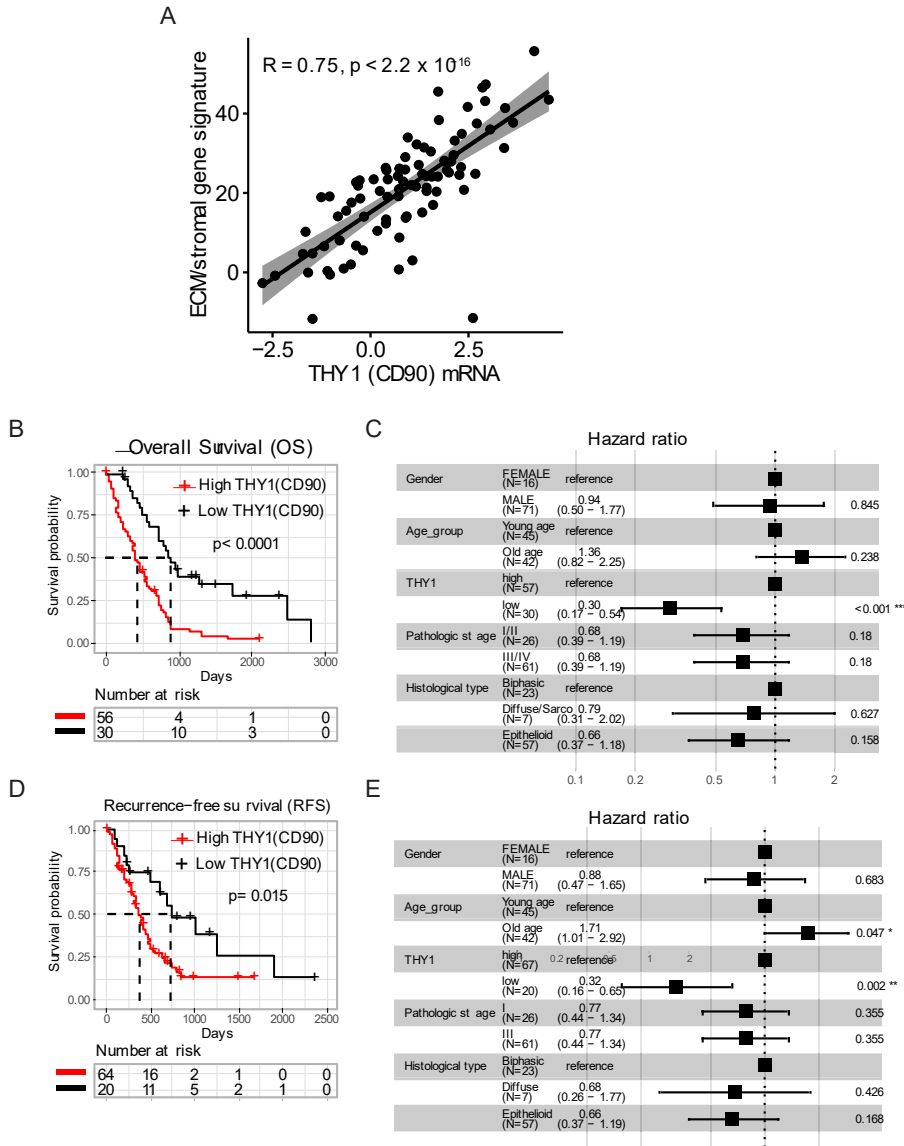

**Figure S3. CD90 expression is an independent factor predicting survival of MPM patients.**

(A) Correlation analysis of CD90 mRNA level and ECM/stromal gene signature across The Cancer Genome Atlas (TCGA) MPM cohort. (B-E) Univariate (B, D) and multivariate analyses (C, E) showing overall survival (OS) (B, C) and recurrence-free survival (RFS) (D, E) stratified by the gene expression of CD90 in treatment naïve MPM. Related to Figure 4.



Figure S4

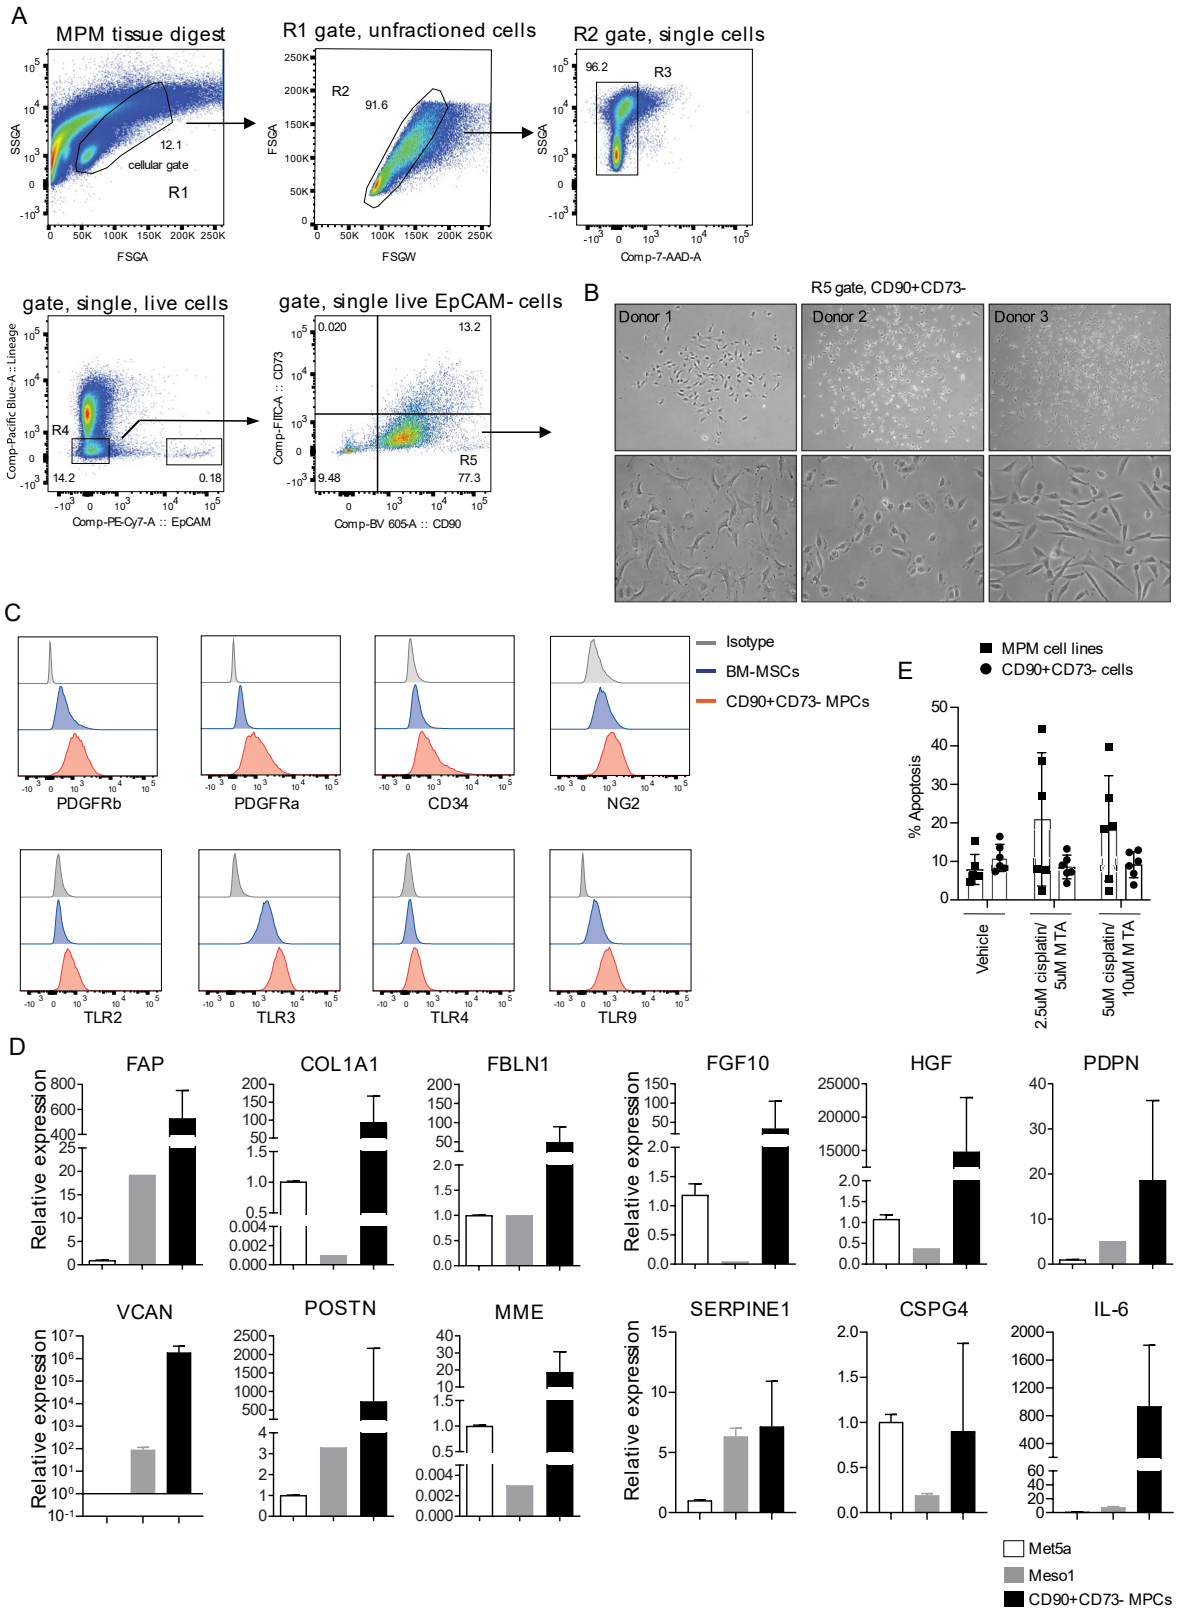

**Figure S4. Identifying and characterizing CD90+ cell subset in MPM.** (A) Gating strategy to identify mesenchymal cell fractions in MPM and their subsets expressing CD90 and CD73 shown as bivariate plots from one representative donor. (B) Phase contrast images of prospectively isolated CD90+ cells using FACS. (C) Representative histograms showing expression of several surface proteins in CD90+ MPCs. (D) Box plots showing the change in mRNA expression in a distinct ECM/stromal gene set in CD90+ MPCs. mRNA level in MET-5A mesothelial cells is set at one. CD90+ MPCs, n = 10, biological replicates in total. (E) Bar graph showing the quantification of cells stained for Annexin V and propidium iodide (PI) after exposure to chemotherapy. MPM cell lines, n = 6, (Meso1, Meso44, H28, JL1, H2452, H2052) and CD90+CD73- cells, n = 6, biological replicates. Data are presented as mean  $\pm$  SD. Error bars show SD. Analysis of more than two groups by one-way ANOVA and multiple comparisons using post hoc Tukeys test. Related to Figure 4.

Figure S5

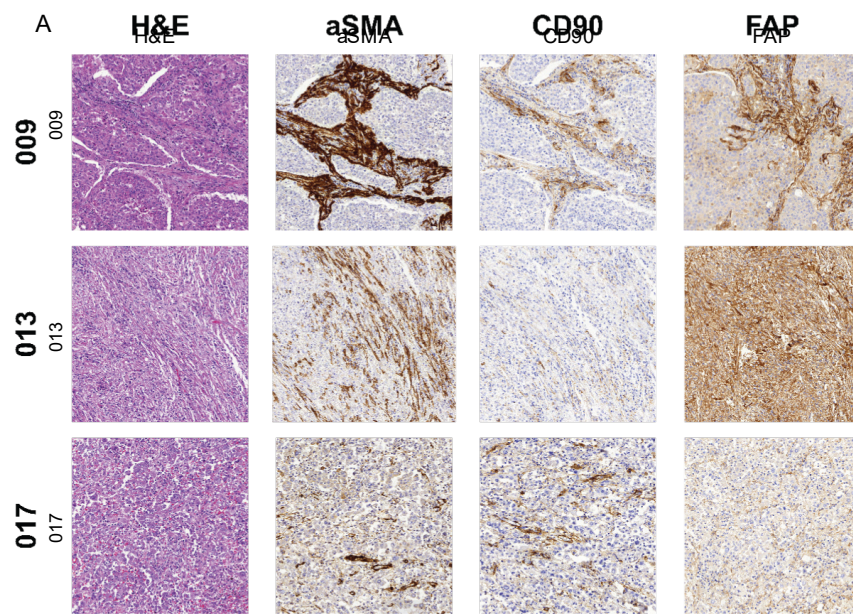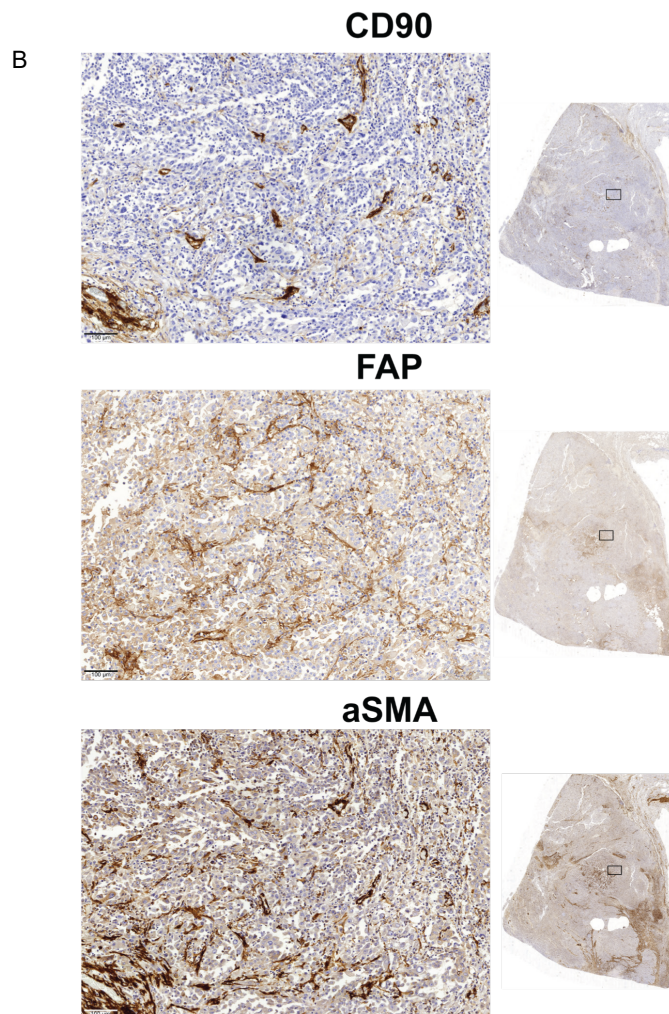

**Figure S5. CD90+ cells co-express  $\alpha$ SMA and FAP.** (A) Post-NAC samples in hematoxylin & eosin (H&E), alpha-smooth muscle actin ( $\alpha$ SMA), CD90 and fibroblast activation protein (FAP). (B) Co-expression in CD90,  $\alpha$ SMA and FAP in the post-NAC sample of an epitheloid specimen 017. Scale bar, 100  $\mu$ m. Related to Figure 4.

Figure S6

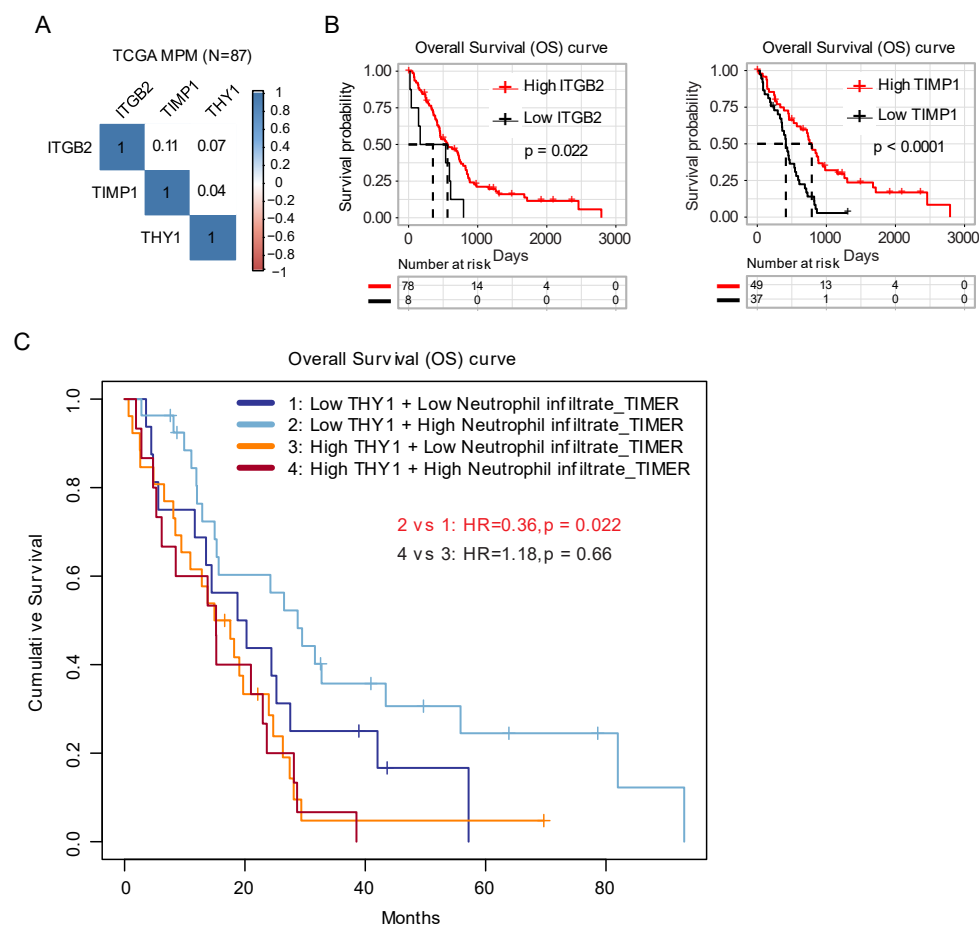

**Figure S6. Association between THY1/CD90 and other immune cell markers.**

(A) Correlation matrix showing correlation among THY1, ITGB2 (Mac-1), and TIMP1 expression. (B) Kaplan–Meier analysis of TCGA MPM patient cohort based on ITGB2 and TIMP1 expression. Patients with high- (red) or low (black) gene expression were stratified by the optimal cutoff value of the ITGB2 and TIMP1, respectively, across all patients using the surv\_cutpoint function in the R “maxstat” package. Overall survival

rates were analyzed and plotted using the R “survival” and “survminer” package. The p-value is calculated by the log-rank test. **(C)** Cox multivariate analysis showing the association of THY1 expression and neutrophil infiltrates with overall survival in TCGA MPM patients. Age, gender, tumor stage and tumor purity were adjusted. Related to Figure 4.

Figure S7

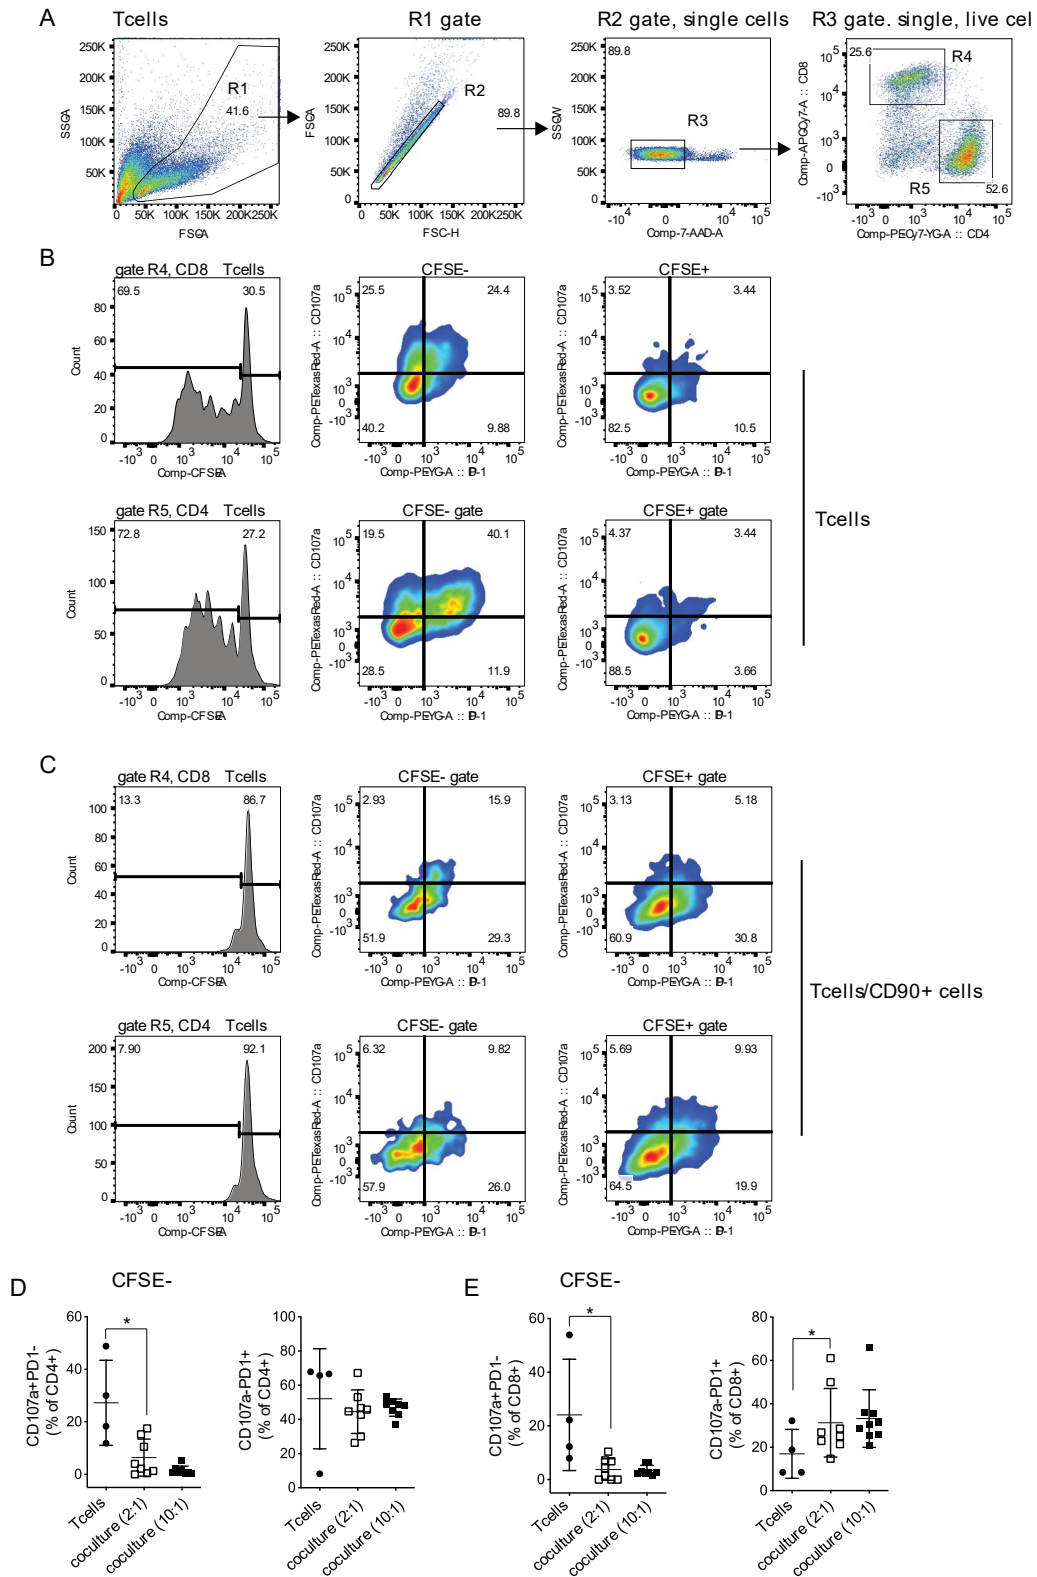

**Figure S7. CD90+ MPCs inhibit T cells following TCR-dependent stimulation with SEB. (A) Schematic representation of gating strategy to examine the immune**

suppressive function of CD90+ MPCs cells on CD3+ T cells. **(B, C)** Representative flow cytometric histograms showing proliferation of CFSE-labeled T cells and expression CD107a and PD1 isolated from the peripheral blood of a healthy donor 5 days following activation with staphylococcal enterotoxin B (SEB, 500 ng/mL) alone **(B)** or in the presence of immune primed (IP) CD90+ MPCs cells **(C)** at a 2:1 ratio. **(D, E)** Scatter plots showing % of proliferating (CFSE-) CD4 and CD8 T cells **(D)** and non-proliferating (CFSE+) CD4 and CD8 T cells **(E)**. For coculture conditions n = 9 in total. Data presented as mean  $\pm$  SD. Significant differences calculated using one way ANOVA following by post hoc Tukey's range test. \* P < 0.05; ns, not significant. Related to Figure 5.

**Table S1. Patient Clinical Characteristics**

|                                              |              |
|----------------------------------------------|--------------|
| <b>Total # of patients, n</b>                | 20           |
| <b>Gender, n (%)</b>                         |              |
| male                                         | 17 (85%)     |
| female                                       | 3 (15%)      |
| <b>Age at diagnosis, years, mean (range)</b> | 71 (64 – 81) |
| <b>Histology</b>                             |              |
| Epitheloid                                   | 14 (70%)     |
| Biphasic                                     | 3 (15%)      |
| Sarcomatoid                                  | 2 (10%)      |
| Epitheloid/Sarcomatoid                       | 1 (5%)       |
| <b>Asbestos exposure</b>                     |              |
| yes                                          | 8 (40%)      |
| no                                           | 10 (50%)     |
| unknown                                      | 2 (10%)      |
| <b>Smoking Status, n (%)</b>                 |              |
| never                                        | 8 (11%)      |
| former                                       | 10 (85%)     |
| current                                      | 4 (67%)      |
| unknown                                      | 2 (3%)       |
| pack years, average (range)                  | 20 (1-60)    |
| <b>Prior chemotherapy, n (%)</b>             |              |
| yes                                          | 16 (80%)     |
| no                                           | 4 (20%)      |
| <b>Patient survival, n (%)</b>               | 3 (15%)      |



**Table S2.** List of antibodies used for FACS/flow cytometric analysis

| <b>Primary Antibodies for Flow Cytometry</b> | <b>Manufacturer</b> | <b>Clone</b> | <b>Catalog #</b> |
|----------------------------------------------|---------------------|--------------|------------------|
| CD326-PE-Cy7                                 | eBioscience         | 1B7          | 25-9326-42       |
| CD73-APC                                     | eBioscience         | AD2          | 17-0739-42       |
| CD73-APC-Cy7                                 | BioLegend           | AD2          | 344022           |
| CD90-BV605                                   | BioLegend           | 5E10         | 328128           |
| CD90-PE-TR                                   | BD Biosciences      | 5E10         | 562385           |
| CD45-eFluor®450                              | eBioscience         | 2D1          | 48-9459-42       |
| CD14-eFluor®450                              | eBioscience         | 61D3         | 48-0149-42       |
| CD31-eFluor®450                              | eBioscience         | WM-59        | 48-0319-42       |
| CD235a-eFluor®450                            | eBioscience         | HIR2         | 48-9987-42       |
| PD-L1-APC                                    | eBioscience         | M1H1         | 17-5983-42       |
| PD-L1-PE                                     | eBioscience         | M1H1         | 12-5983-42       |
| CD45-Percp-Cy5.5                             | eBioscience         | 2D1          | 45-9459-42       |
| CD19-FITC                                    | BioLegend           | HIB19        | 302206           |
| CD3-eVolve™605                               | eBioscience         | OKT3         | 83-0037-42       |
| CD3-APC-R700                                 | BD Biosciences      | UCHT1        | 565119           |
| CD3-BV421™                                   | BioLegend           | OKT3         | 317344           |
| CD4-PE-Cy7                                   | eBioscience         | RPA-T4       | 25-0049-42       |
| CD4-BV421                                    | BioLegend           | RPA-T4       | 300531           |
| CD4-BUV396                                   | BD Horizon™         | RPA-T4       | 564724           |
| CD8-APC/Fire™750                             | BioLegend           | SK1          | 344746           |
| CD8-APC-eFluor®780                           | eBioscience         | SK1          | 47-0087-42       |
| CD8-BUV                                      | BD Horizon™         | RPA-T8       | 612942           |
| CD45RO-APC                                   | eBioscience         | UCHL1        | 17-0457-42       |
| CD45RA-PE-Cy7                                | BioLegend           | HI100        | 304126           |

|                        |                 |           |             |
|------------------------|-----------------|-----------|-------------|
| CD45RA-APC             | eBioscience     | HI100     | 17-0458-42  |
| CCR7-BV421™            | BioLegend       | G043H7    | 353208      |
| PD-1-PE                | eBioscience     | eBioJ105  | 12-2799-42  |
| CD107a-PE-eFluor™610   | eBioscience     | EBioH4A3  | 61-1079-42  |
| CD107a-PE              | BioLegend       | H4A3      | 328608      |
| CD127-BV711            | eBioscience     | EBioRDR5  | 61-1278-42  |
| CD127-eFluor®450       | eBioscience     | EBioRDR5  | 48-1278-42  |
| HLA-DR-FITC            | eBioscience     | LN3       | 11-9956-42  |
| TOX-PE                 | eBioscience     | TXRX10    | 12-6502-82  |
| CTLA4-BV786            | BD Horizon™     | BNI3      | 563931      |
| NG2-Alexa Fluor 488    | eBioscience     | 9.2.27    | 53-6504-82  |
| CD34-PE                | Miltenyi Biotec | AC136     | 130-113-179 |
| PDGFR $\alpha$ -PE-Cy7 | BioLegend       | 16A1      | 323508      |
| PDGFR $\beta$ -APC     | BioLegend       | 18A2      | 323608      |
| TLR2 (CD-222)-BV421    | BD Horizon™     | 11G7      | 565350      |
| TLR3 (CD283)-PE        | eBioscience     | TLR3.7    | 12-9039-82  |
| TLR4 (CD284)-BV786     | BD Horizon      | TF901     | 564402      |
| TLR9 (CD286)-APC       | eBioscience     | eB72-1665 | 17-9099-82  |
| 7-AAD                  | eBioscience     |           | 00-6990-50  |
| Live/Dead Near IR      | eBioscience     |           | L34975      |
| Zombie green           | BioLegend       |           | 432112      |

**Table S3.** List of primer probes

| <b>Target gene</b>      | <b>Refseq ID</b>      |
|-------------------------|-----------------------|
| FGF10                   | NM_004465(1)          |
| PDPN                    | NM_001006624(2)       |
| HGF                     | NM_000601(2)          |
| POSTN                   | <i>NM_001135934.1</i> |
| IL6                     | <i>NM_000600.3</i>    |
| FAP                     | NM_001291807.1        |
| VCAN                    | NM_001126336.2        |
| COL1A1                  | NM_000088.3           |
| FBLN1                   | NM_001996.3           |
| MME                     | NM_000902.3           |
| SERPINE1                | NM_000602.4           |
| CSPG4                   | NM_001897.4           |
| <b>Internal control</b> | <b>Refseq ID</b>      |
| HMBS                    | NM_000190(1)          |
| TBP                     | <i>NM_003194</i>      |
| POLR2A                  | <i>NM_000937</i>      |
| PPIA                    | NM_021130(1)          |
| ACTB                    | NM_001101(1)          |
| HMBS                    | NM_000190(1)          |

**Table S4.** Co-expression of CD90 with fibroblast markers alpha smooth muscle actin ( $\alpha$ SMA) and fibroblast activation protein (FAP) in the different tiles of samples.

| ID         | CD90/ $\alpha$ SMA | CD90/FAP |
|------------|--------------------|----------|
| 009_post_1 | complete           | complete |
| 009_post_2 | complete           | complete |
| 009_post_3 | complete           | complete |
| 009_pre_1  | complete           | complete |
| 009_pre_2  | complete           | complete |
| 009_pre_3  | complete           | complete |
| 013_post_1 | complete           | complete |
| 013_post_2 | complete           | complete |
| 013_post_3 | complete           | complete |
| 013_pre_1  | complete           | complete |
| 013_pre_2  | partial            |          |
| 013_pre_3  | complete           | complete |
| 017_post_1 | complete           | complete |
| 017_post_2 | complete           | complete |
| 017_post_3 | complete           | complete |
| 017_pre_1  | complete           |          |
| 017_pre_2  | partial            | complete |
| 017_pre_3  | complete           | complete |

*Complete, complete co-expression; partial, partial co-expression; non, no co-expression*
